# Supplementary material for: Orlando espino, Carlos santamaría, Enrique Meseguer and Manuel carreiras (universidad de la laguna) early and late processes in syllogistic reasoning: Evidence from eye-movements, b1–b9
Source: PLOS journal article supplement (doi:10.1371/journal.pcbi.1004893), 2006-01-01

Table S1: RMSD plots of PDZ2 from rigid residue scan for both unbound and bound states. Each residue number represents a simulation in which that particular residue is subjected to rigid body constraints.

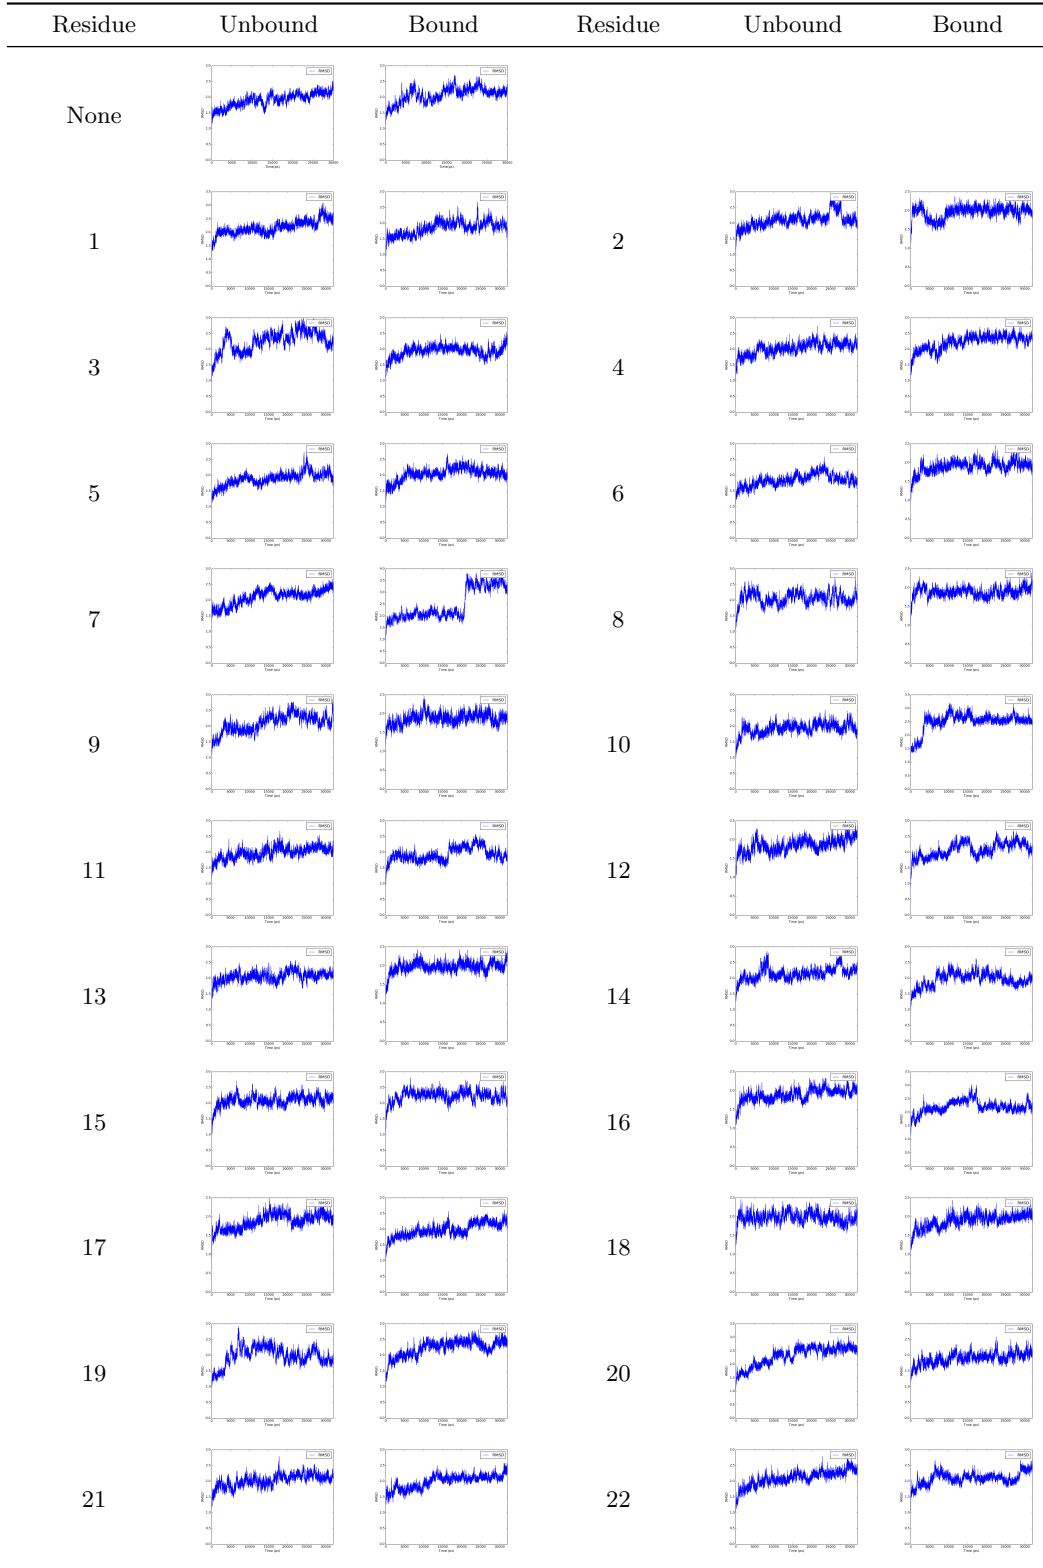

Table S1: RMSD plots of PDZ2 from rigid residue scan for both unbound and bound states. Each residue number represents a simulation in which that particular residue is subjected to rigid body constraints.

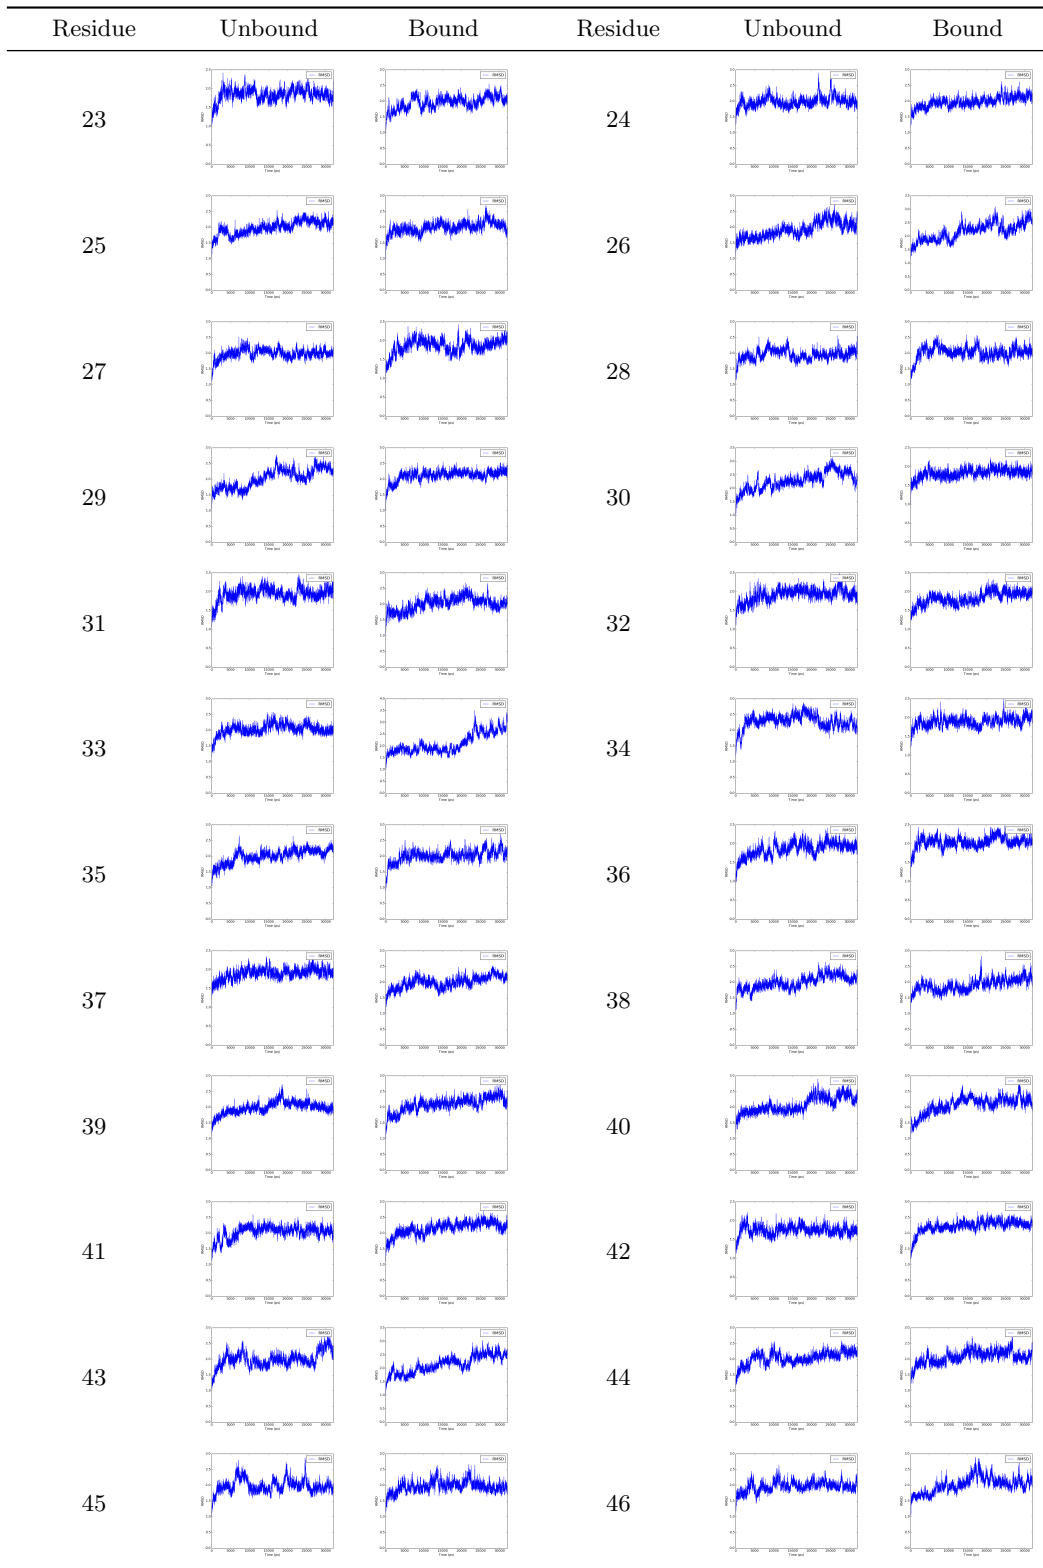

Table S1: RMSD plots of PDZ2 from rigid residue scan for both unbound and bound states. Each residue number represents a simulation in which that particular residue is subjected to rigid body constraints.

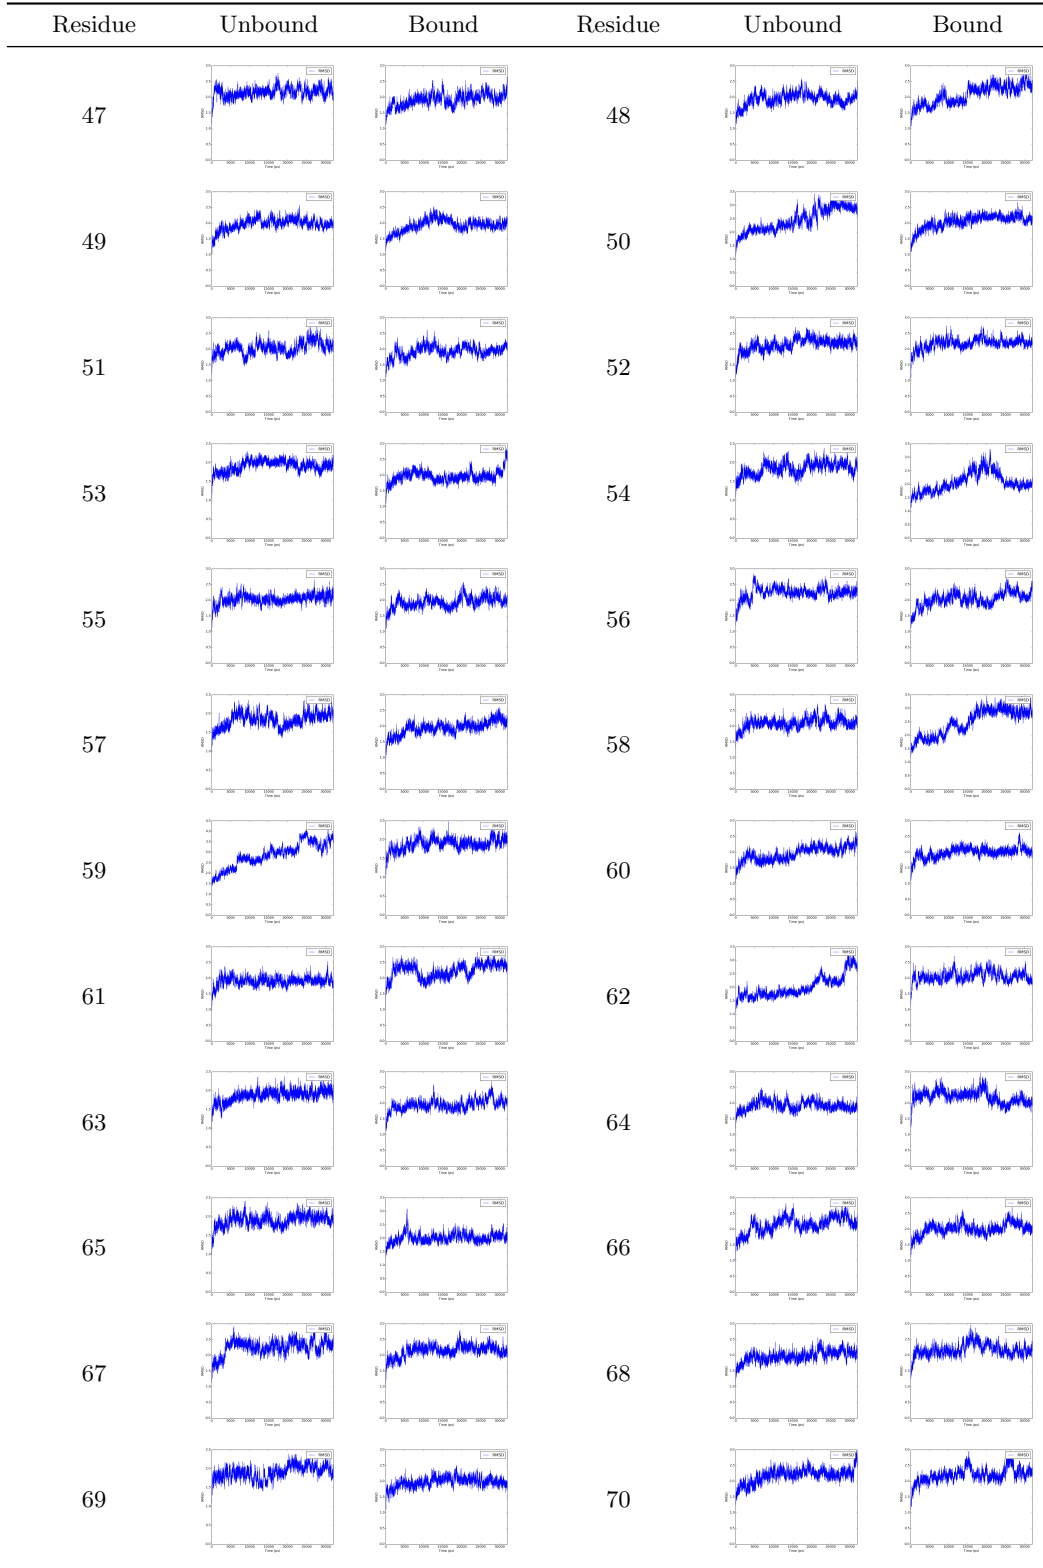

Table S1: RMSD plots of PDZ2 from rigid residue scan for both unbound and bound states. Each residue number represents a simulation in which that particular residue is subjected to rigid body constraints.

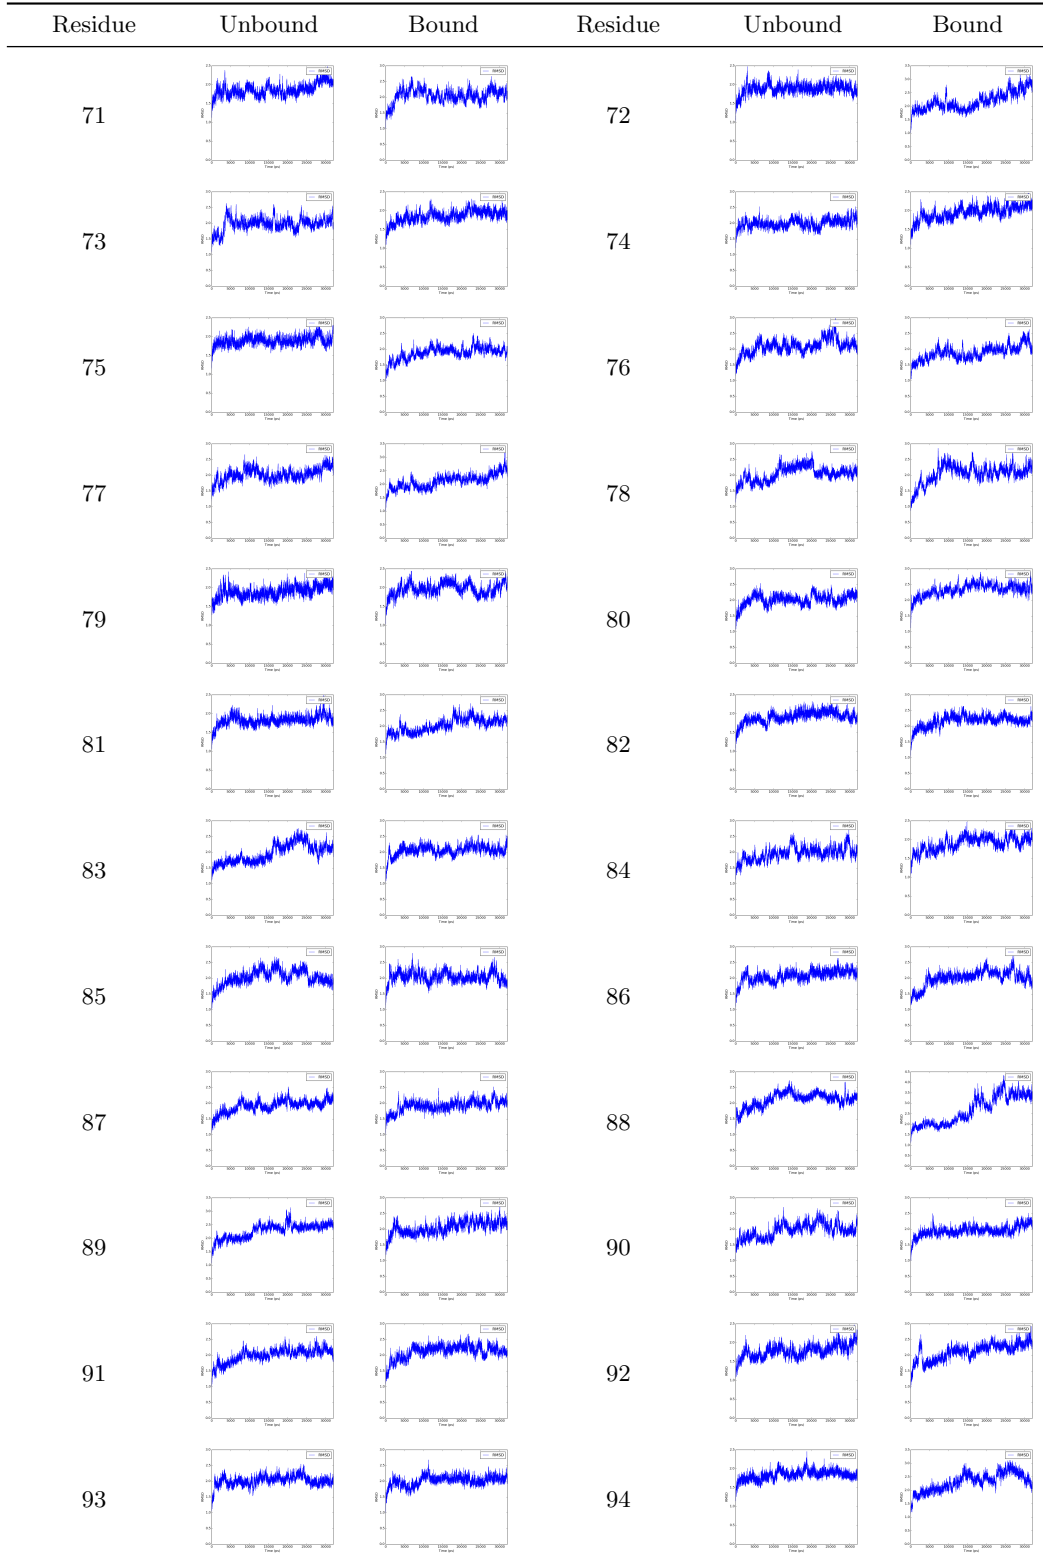

Supplement: S5 (10.1371/journal.pcbi.1004893.s005) [file journal.pcbi.1004893.s005]
